# Supplementary material for: Near-surface and internal lamellar structure and orientation in thin films of rod–coil block copolymers
Source: Royal Society of Chemistry journal article supplement (doi:10.1039/b809092k), 2008-10-24
Supplement: b809092k.pdf [file b809092k.pdf]

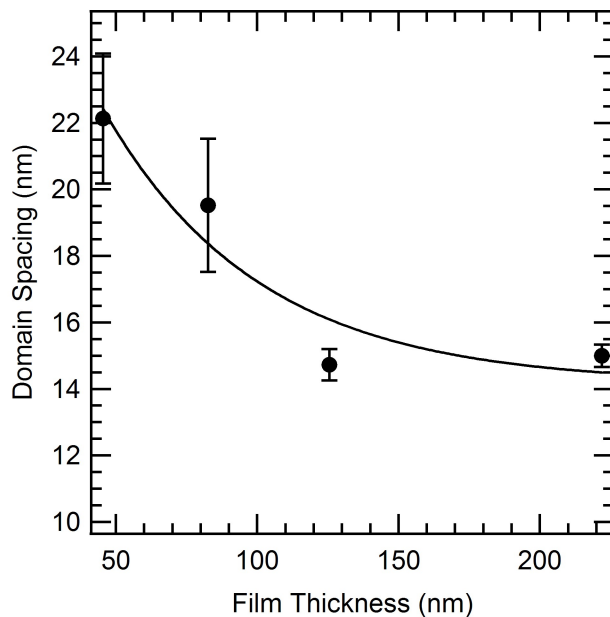

**Figure S1.** Domain spacing of PPVbPI-42 perpendicular lamellae determined by SFM. Fourier transform of SFM images was used to find the average domain spacing. Averages were taken over 4  $1 \mu\text{m}^2$  images, and the error bars indicate the standard deviation of the measurements. While the error in the SFM measurements is significantly greater than the scattering measurements due to the reduced sample size, a clear trend of domain dilation in thin films is still observed, and the domain spacing decays to near the bulk value as film thickness is increased.

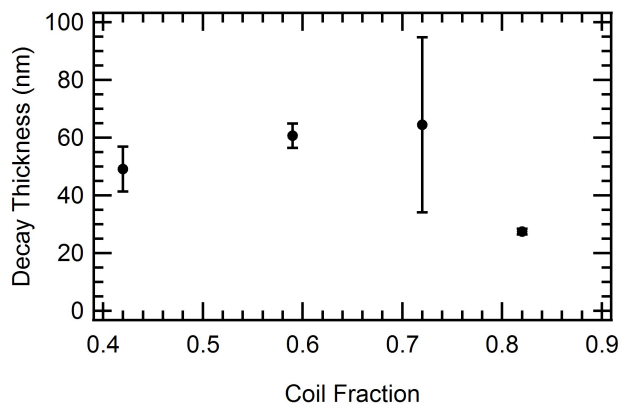

**Figure S2.** Exponential decay parameter with changing coil fraction. Increasing coil fraction results in an increase in polymer mobility, leading to faster decay of lamellar dilation with increasing film thickness.
